# Supplementary material
Source: Springer Nature journal article supplement (https://www.springermedizin.de/resource/supplementary/12883_2014_1038_MOESM1_ESM.pdf/9456390)
Supplement: MOESM1 [file 9456390]

78 MS fathers

78 pregnancies

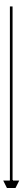

Exposed to DMD

45 men

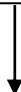

44 Live births

1 Spontaneous abortion

Not Exposed

33 men

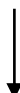

31 Live births

2 intentional therapeutic abortions\*
